# Supplementary material for: Cardiomyocyte Proliferative Capacity Is Restricted in Mice With Lmna Mutation
Source: PubMed Central journal article supplement (PMC8260675; doi:10.3389/fcvm.2021.639148), 2021-06-23
Supplement: Data_Sheet_1.pdf [file Data_Sheet_1.pdf]

*Supplementary Material*

**Supplementary Data**

## Supplementary Tables

**Supplementary Table 1.** Number of reads processed and aligned to mouse genome (mm9)

|                                                                             | WT<br>in 5 weeks       | <i>Lmna</i> <sup>+/-</sup><br>in 5 weeks | <i>Lmna</i> <sup>-/-</sup><br>in 5 weeks | WT<br>in 1 year       | <i>Lmna</i> <sup>+/-</sup><br>in 1 year | WT<br>in 2 years      | <i>Lmna</i> <sup>+/-</sup><br>in 2 years |
|-----------------------------------------------------------------------------|------------------------|------------------------------------------|------------------------------------------|-----------------------|-----------------------------------------|-----------------------|------------------------------------------|
| Total number of reads<br>processed                                          | 155,841,948            | 147,171,682                              | 140,488,230                              | 71,536,068            | 77,191,076                              | 69,896,038            | 74,310,846                               |
| Number of reads aligned to<br>mouse genome<br>(percentage of reads aligned) | 122,041,795<br>(78.3%) | 115,552,360<br>(78.5%)                   | 110,397,124<br>(78.5%)                   | 57,721,725<br>(80.7%) | 61,518,741<br>(79.7%)                   | 55,803,017<br>(79.8%) | 57,377,011<br>(77.2%)                    |

**Supplementary Table 2.** Number of up- or down-regulated genes in *Lmna* mutant mice among the total of 30,387 genes

|                                           | Number of up-regulated genes<br>(ratio>1.5, $P<0.001$ , normalized<br>number of reads in WT>1) | Number of down-regulated genes<br>(ratio<0.67, $P<0.001$ , normalized<br>number of reads in WT>1) |
|-------------------------------------------|------------------------------------------------------------------------------------------------|---------------------------------------------------------------------------------------------------|
| <i>Lmna</i> <sup>-/-</sup> /WT in 5 weeks | 1,654                                                                                          | 1,092                                                                                             |
| <i>Lmna</i> <sup>+/-</sup> /WT in 5 weeks | 72                                                                                             | 172                                                                                               |
| <i>Lmna</i> <sup>+/-</sup> /WT in 1 year  | 135                                                                                            | 30                                                                                                |
| <i>Lmna</i> <sup>+/-</sup> /WT in 2 years | 2,054                                                                                          | 125                                                                                               |

**Supplementary Table 3.** Top biological functions related to *Lmna* mutant mice from RNA-seq analysis.

| <i>Lmna</i> <sup>+/-</sup> /wt in 5 weeks                   |                                             |                 | <i>Lmna</i> <sup>+/-</sup> /wt in 1 year |                                             |                 |
|-------------------------------------------------------------|---------------------------------------------|-----------------|------------------------------------------|---------------------------------------------|-----------------|
| Biological function                                         | Number of genes/total genes in the category | <i>P</i> -value | Biological function                      | Number of genes/total genes in the category | <i>P</i> -value |
| Extension of plasma membrane projections                    | 8/197                                       | 4.55E-05        | Activation of cells                      | 34/1638                                     | 8.23E-14        |
| Islet-cell carcinoma                                        | 3/15                                        | 1.21E-04        | Quantity of blood cells                  | 31/1506                                     | 3.01E-11        |
| Abnormal morphology of parasympathetic postganglionic fiber | 2/3                                         | 1.76E-04        | Quantity of leukocytes                   | 29/1322                                     | 3.02E-11        |
| Loss of ciliary neuron                                      | 2/3                                         | 1.76E-04        | Activation of blood cells                | 26/1183                                     | 7.29E-11        |
| Diffuse B-cell lymphoma                                     | 5/110                                       | 1.78E-04        | Activation of leukocytes                 | 24/1014                                     | 1.47E-10        |
| Development of digestive system                             | 11/414                                      | 2.18E-04        | Quantity of helper T lymphocytes         | 13/210                                      | 3.15E-10        |
| Differentiation of muscle cells                             | 9/314                                       | 2.90E-04        | Leukocyte migration                      | 26/1449                                     | 1.98E-09        |
| Formation of cellular protrusions                           | 17/1032                                     | 4.42E-04        | Quantity of mononuclear leukocytes       | 23/995                                      | 4.34E-09        |
| Survival of enteric neurons                                 | 2/6                                         | 5.79E-04        | Proliferation of T lymphocytes           | 21/895                                      | 4.96E-09        |
| Organization of cytoplasm                                   | 25/1886                                     | 6.41E-04        | Encephalomyelitis                        | 13/295                                      | 6.40E-09        |

Right-tailed Fisher's exact test.

**Supplementary Table 4.** Gene list involved in proliferation of cell category in RNA-seq analysis of *Lmna* mutant mice.

| Gene           | Description                              | Normalized reads in WT 5 weeks | Fold change <i>Lmna</i> <sup>-/-</sup> /WT 5 weeks | Normalized reads in WT 2 years | Fold change <i>Lmna</i> <sup>+/-</sup> /WT 2 years | Predicted effect to proliferation of cells in 5 weeks / 2 years | Number of evidence (papers) |
|----------------|------------------------------------------|--------------------------------|----------------------------------------------------|--------------------------------|----------------------------------------------------|-----------------------------------------------------------------|-----------------------------|
| <i>Cdkn1a</i>  | cyclin-dependent kinase inhibitor 1      | 44.4                           | 6.22                                               | 58.6                           | 2.03                                               | Decreased/Decreased                                             | 204                         |
| <i>Agt</i>     | angiotensinogen                          | 5.1                            | 5.01                                               | 7.7                            | 1.16                                               | Increased/-                                                     | 92                          |
| <i>Igf1r</i>   | insulin-like growth factor I receptor    | 31.1                           | 2.97                                               | 35.8                           | 1.43                                               | Increased/-                                                     | 88                          |
| <i>Myc</i>     | myc proto-oncogene protein               | 4.6                            | 1.94                                               | 9.0                            | 1.55                                               | Increased/Increased                                             | 261                         |
| <i>Egf</i>     | epidermal growth factor                  | 8.2                            | -1.51                                              | 5.9                            | -1.29                                              | Decreased/-                                                     | 342                         |
| <i>Cav1</i>    | caveolin-1                               | 233.2                          | -1.59                                              | 192.3                          | 1.02                                               | Increased/-                                                     | 58                          |
| <i>Il15</i>    | Interleukin-15                           | 2.7                            | -1.85                                              | 1.9                            | 1.54                                               | Decreased/Increased                                             | 207                         |
| <i>Csf1</i>    | macrophage colony-stimulating factor 1   | 53.6                           | -2.02                                              | 47.5                           | 1.02                                               | Decreased/-                                                     | 85                          |
| <i>Tnfsf10</i> | tumor necrosis factor ligand superfamily | 6.3                            | -2.06                                              | 5.8                            | -1.05                                              | Decreased/-                                                     | 61                          |
| <i>Kit</i>     | mast/stem cell growth factor receptor    | 3.5                            | -2.39                                              | 1.1                            | 2.02                                               | Decreased/Increased                                             | 106                         |
| <i>Ccnd1</i>   | G1/S-specific cyclin-D1                  | 34.8                           | -3.50                                              | 46.1                           | 1.48                                               | Decreased/-                                                     | 86                          |

**Supplementary Table 5. Top transcription regulators related to *Lmna* mutation.**

| <i>Lmna</i> <sup>-/-</sup> /WT in 5 weeks |                                        |                 | <i>Lmna</i> <sup>+/-</sup> /WT in 2 years |                                        |                 |
|-------------------------------------------|----------------------------------------|-----------------|-------------------------------------------|----------------------------------------|-----------------|
| Transcription regulators                  | Number of target genes in the category | <i>P</i> -value | Transcription regulators                  | Number of target genes in the category | <i>P</i> -value |
| TP53                                      | 229                                    | 6.63E-19        | TP53                                      | 226                                    | 9.79E-28        |
| MYC                                       | 161                                    | 1.94E-15        | MYC                                       | 163                                    | 1.55E-23        |
| STAT3                                     | 95                                     | 3.39E-15        | MTPN                                      | 40                                     | 1.16E-20        |
| NFKBIA                                    | 97                                     | 1.24E-13        | NFKBIA                                    | 100                                    | 5.56E-20        |
| CEBPB                                     | 86                                     | 1.28E-12        | HTT                                       | 136                                    | 3.35E-18        |

  

| <i>Lmna</i> <sup>+/-</sup> /WT in 5 weeks |                                        |                 | <i>Lmna</i> <sup>+/-</sup> /WT in 1 year |                                        |                 |
|-------------------------------------------|----------------------------------------|-----------------|------------------------------------------|----------------------------------------|-----------------|
| Transcription regulators                  | Number of target genes in the category | <i>P</i> -value | Transcription regulators                 | Number of target genes in the category | <i>P</i> -value |
| GATA2                                     | 5                                      | 3.12E-04        | STAT3                                    | 15                                     | 3.97E-08        |
| SP1                                       | 12                                     | 4.13E-04        | CIITA                                    | 5                                      | 2.82E-06        |
| NFATC4                                    | 3                                      | 1.09E-03        | NFkB                                     | 15                                     | 4.01E-06        |
| NFATC3                                    | 4                                      | 1.15E-03        | STAT1                                    | 9                                      | 3.67E-05        |
| CLOCK                                     | 5                                      | 6.51E-03        | CTNNB1                                   | 13                                     | 5.18E-05        |

Right-tailed Fisher's exact test

**Supplementary Figures**
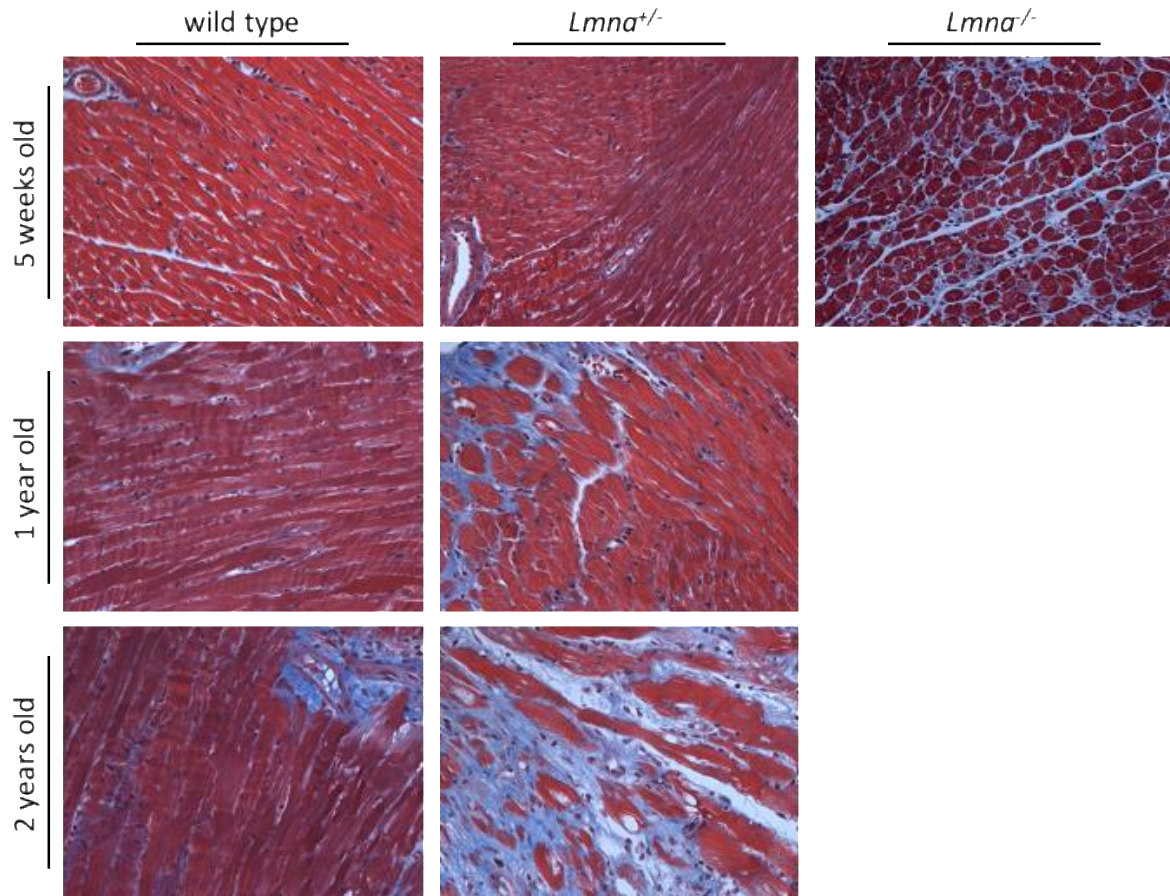

**Supplementary Figure 1.** Myocardial histology in mice aged 5 weeks, 1 year, and 2 years stained by Masson-Trichrome staining.

Masson's trichrome staining showed massive fibrosis in *Lmna*<sup>-/-</sup> mice at 5 weeks of age. Interestingly, those cardiac phenotypes including enlarged LV chamber reduced contractile function, and severe fibrosis were comparable to those of *Lmna*<sup>+/-</sup> mice observed at 2 years of age (see also Table 1), which suggested that the cardiac phenotypes developed more rapidly in *Lmna*<sup>-/-</sup> mice than in *Lmna*<sup>+/-</sup> mice, sharing similar pathology at different ages. Scale bar: 50  $\mu$ m.

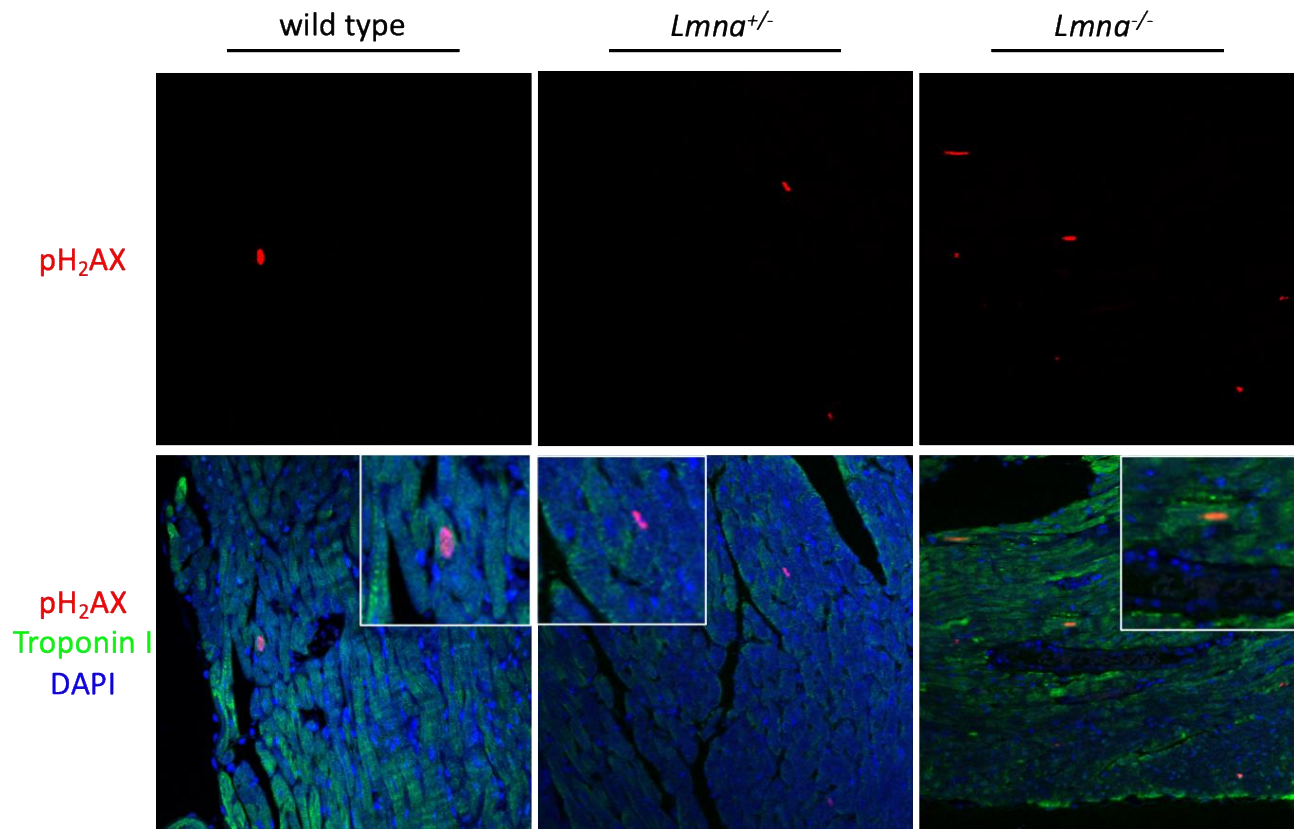

**Supplementary Figure 2.** Phospho Histone H<sub>2</sub>AX staining in mice aged 5 weeks of wild type and *Lmna* mutations.

The top panel shows single immunostaining results, and the bottom panel shows merged figures of anti-pH<sub>2</sub>AX Ab (red), anti-troponin I (green), and anti-DAPI (blue). Scale bar: 50 μm.

A significantly higher percentage of pH<sub>2</sub>AX positive myocytes in *Lmna*<sup>-/-</sup> compared to *Lmna*<sup>+/-</sup> or WT mice were observed (see also Figure 4d). This result suggested that mice with *Lmna* mutation have more DNA damage than WT, possibly responsible for the increased p53 and p21 activities.



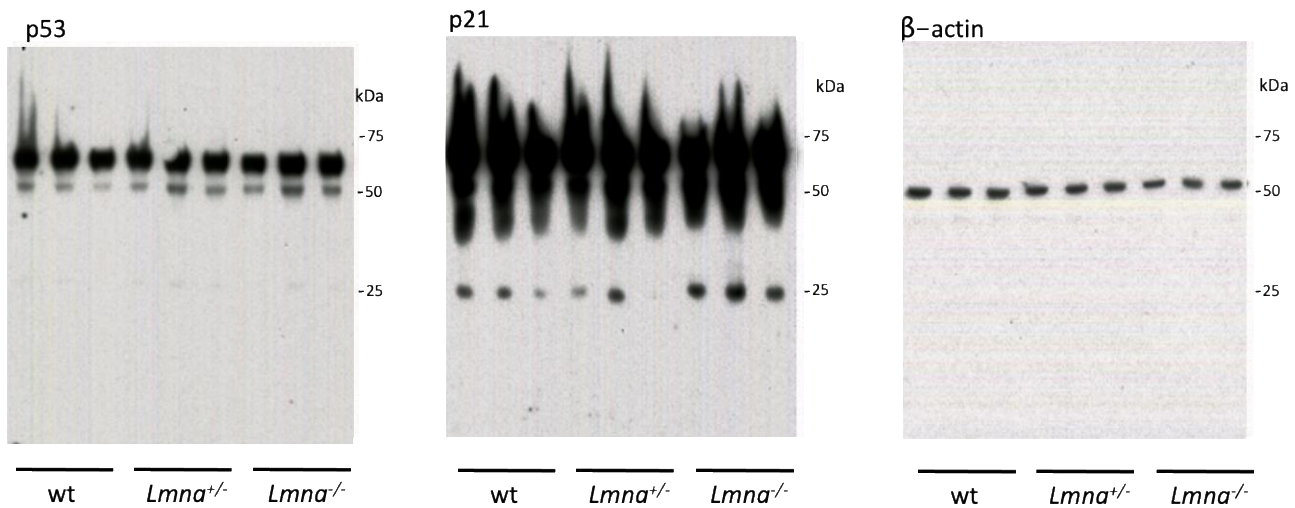

**Supplementary Figure 3.** Uncropped Blots of Figure4b. Protein expression of p21 and p53 in 5 weeks. Western blot analysis of LV tissue hybridized with p53, p21, and β-actin antibodies.
